# Supplementary material for: Invasive Fungal Breakthrough Infections under Targeted Echinocandin Prophylaxis in High-Risk Liver Transplant Recipients
Source: MDPI journal article supplement (doi:10.3390/jof9020272), 2023-02-18
Supplement: s1 [file s1]

# Invasive Fungal Breakthrough Infections under Targeted Echinocandin Prophylaxis in High-Risk Liver Transplant Recipients

Robert Bretkopf, Benedikt Treml, Thomas Senoner, Zoran Bukumirić and Sasa Rajsic

## Supplementary material

### Contents

**Table S1.** Risk factors for b-IFI within 90 days from liver transplantation: univariate Cox regression analyses (n = 100)

**Table S2.** Antimycotic prophylaxis (n = 100)

**Table S3.** Literature overview of Echinocandin use as prophylaxis in liver transplant recipients

**Table S1.** Risk factors for b-IFI within 90 days from liver transplantation: univariate Cox regression analyses ( $n = 100$ )

| Nondependent variable                                                      | B-coefficient | P-value | HR   | 95% confidence interval |       | Missing data<br>(n/Total) |
|----------------------------------------------------------------------------|---------------|---------|------|-------------------------|-------|---------------------------|
|                                                                            |               |         |      | lower                   | upper |                           |
| Age (years)                                                                | -0.056        | 0.002   | 0.95 | 0.91                    | 0.98  | 0/100                     |
| Sex (male)                                                                 | 0.973         | 0.054   | 2.65 | 0.99                    | 7.11  | 0/100                     |
| Height (cm)                                                                | 0.005         | 0.865   | 1.01 | 0.95                    | 1.07  | 0/100                     |
| Weight (kg)                                                                | -0.018        | 0.225   | 0.98 | 0.95                    | 1.01  | 0/100                     |
| Body mass index (kg/m <sup>2</sup> )                                       | -0.077        | 0.126   | 0.93 | 0.84                    | 1.02  | 0/100                     |
| SAPS III score                                                             | -0.022        | 0.530   | 0.98 | 0.91                    | 1.05  | 0/100                     |
| MELD score                                                                 | 0.010         | 0.733   | 1.01 | 0.96                    | 1.07  | 0/100                     |
| Charlson comorbidity index                                                 | -0.003        | 0.979   | 1.00 | 0.81                    | 1.23  | 0/100                     |
| Cold ischemia time (minutes)                                               | 0.001         | 0.041   | 1.00 | 1.00                    | 1.00  | 0/100                     |
| Warm ischemia time (minutes)                                               | 0.001         | 0.172   | 1.00 | 1.00                    | 1.01  | 0/100                     |
| Surgery duration (minutes)                                                 | 0.001         | 0.958   | 1.00 | 1.00                    | 1.00  | 0/100                     |
| <b>Underlying disease malignancy and other tumors (reference category)</b> |               |         |      |                         |       | 0/100                     |
| Alcoholic liver disease                                                    | -1.768        | 0.115   | 0.17 | 0.02                    | 1.54  |                           |
| Virus related                                                              | -0.523        | 0.712   | 0.59 | 0.04                    | 9.51  |                           |
| Non-alcoholic fatty liver disease                                          | -1.081        | 0.378   | 0.34 | 0.03                    | 3.75  |                           |
| Budd-Chiari syndrome                                                       | -             | -       | -    | -                       | -     |                           |
| Acute liver failure                                                        | -1.362        | 0.336   | 0.26 | 0.02                    | 4.12  |                           |
| Cholestatic                                                                | -             | -       | -    | -                       | -     |                           |
| Autoimmune hepatitis                                                       | -1.339        | 0.223   | 0.26 | 0.03                    | 2.26  |                           |
| Metabolic Liver Disease                                                    | -0.779        | 0.583   | 0.46 | 0.03                    | 7.37  |                           |
| Other                                                                      | -2.116        | 0.135   | 0.12 | 0.01                    | 1.93  |                           |
| <b>Preoperative risk factors</b>                                           |               |         |      |                         |       |                           |
| MELD Score >30                                                             | 0.270         | 0.674   | 1.31 | 0.37                    | 4.60  | 0/100                     |
| Fungal colonization at baseline                                            | 0.486         | 0.449   | 1.63 | 0.46                    | 5.71  | 0/100                     |
| Antiinfective pretreatment                                                 | -0.884        | 0.242   | 0.41 | 0.09                    | 1.82  | 0/100                     |
| Pretransplant serum creatinine >2 mg/dl                                    | -0.855        | 0.316   | 0.43 | 0.08                    | 2.26  | 0/100                     |
| <b>Operative risk factors</b>                                              |               |         |      |                         |       |                           |
| Preservation (static cold storage)                                         | -0.818        | 0.202   | 0.44 | 0.13                    | 1.55  | 0/100                     |
| Choledochojejunostomy, primary                                             | 0.302         | 0.689   | 1.35 | 0.31                    | 5.96  | 0/100                     |
| Piggyback operative technique                                              | 2.107         | 0.001   | 8.22 | 2.28                    | 29.60 | 0/100                     |
| Transplantation time >11 hrs                                               | -3.035        | 0.685   | -    | -                       | -     | 0/100                     |
| Intraoperative blood transfusion >40 PRBC                                  | 7.725         | 0.096   | 5.61 | 0.74                    | 42.83 | 0/100                     |
| Split liver transplantation                                                | 1.700         | 0.008   | 5.45 | 1.54                    | 19.25 | 0/100                     |
| Donor derived infection                                                    | 2.124         | 0.001   | 8.36 | 2.37                    | 29.56 | 0/100                     |
| High-urgency transplantation                                               | 0.574         | 0.448   | 1.78 | 0.40                    | 7.82  | 0/100                     |
| <b>CMV risk - high risk (D+/R-, reference category)</b>                    |               |         |      |                         |       | 0/100                     |
| Intermediate risk (D+/R+, D-/R+)                                           | -0.58         | 0.387   | 0.56 | 0.15                    | 2.08  |                           |

|                                                   |        |       |      |      |       |       |
|---------------------------------------------------|--------|-------|------|------|-------|-------|
| Low risk (D-/R-)                                  | -0.13  | 0.835 | 0.88 | 0.27 | 2.89  |       |
| Extended criteria donation                        | -0.019 | 0.973 | 0.98 | 0.32 | 3.04  | 0/100 |
| Donation after circulatory determination of death | -0.289 | 0.780 | 0.75 | 0.10 | 5.67  | 0/100 |
| <b>Postoperative risk factors</b>                 |        |       |      |      |       |       |
| Bile leak                                         | 1.687  | 0.002 | 5.41 | 1.88 | 15.58 | 0/100 |
| Relaparotomy, any reason                          | 1.294  | 0.043 | 3.65 | 1.04 | 12.81 | 0/100 |
| Early re-transplantation                          | 1.669  | 0.009 | 5.31 | 1.51 | 18.70 | 0/100 |
| Posttransplant dialysis                           | 0.731  | 0.206 | 2.08 | 0.67 | 6.44  | 0/100 |
| CMV viremia                                       | -0.593 | 0.305 | 0.55 | 0.18 | 1.71  | 0/100 |

Abbreviations: IFI, invasive fungal infections; b-IFI, breakthrough IFI; SAPS III, simplified acute physiology score III; MELD, Model for End-Stage Liver Disease Score; PRBC, packed red blood cells; CMV, cytomegalovirus; HR, hazard ratio.

**Table S2.** Antimycotic prophylaxis (n = 100)

| Antimycotic Prophylaxis        | All patients<br>(n =100) | No b-IFI<br>(n =84) | b-IFI<br>(n = 16) | P-value |
|--------------------------------|--------------------------|---------------------|-------------------|---------|
| Antimycotic agent              |                          |                     |                   |         |
| Micafungin                     | 67 (67.0)                | 56 (66.7)           | 11 (68.8)         | 1.000   |
| Anidulafungin                  | 33 (33.0)                | 28 (33.3)           | 5 (31.3)          |         |
| Duration of prophylaxis (days) | 9 (1-86)                 | 10 (1-49)           | 8 (1-40)          | 0.156   |

Data presented as number of patients (%). Abbreviations: IFI: invasive fungal infection; b-IFI, breakthrough IFI.

**Table S3.** Literature overview of Echinocandin use as prophylaxis in liver transplant recipients

| Author                     | Agent                         | Duration of Prophylaxis<br>(days) | n   | 90-days incidence |
|----------------------------|-------------------------------|-----------------------------------|-----|-------------------|
| Doria et al. (2011) [59]   | Caspofungin                   | 8 (1-35)                          | 16  | 0/16 (0)          |
| Sun et al. (2013) [60]     | Micafungin                    | 20 (12-32)                        | 18  | 2/18 (11.1)       |
| Winston et al. (2014) [61] | Anidulafungin                 | 21 (5-46)                         | 98  | 5/98 (5.1)        |
| Saliba et al. (2015) [62]  | Micafungin                    | 16.7 ± 7.0                        | 172 | 4/172 (2.3)       |
| Fortun et al. (2016) [63]  | Caspofungin                   | 22 (14-26)                        | 97  | 4/97 (4.1)        |
| Perella et al. (2016) [64] | Caspofungin                   | -                                 | 26  | 0/26 (0)          |
| Neyra et al. (2020) [65]   | Micafungin                    | 12                                | 33  | 1/33 (3)          |
| Kang et al. (2020) [66]    | Micafungin                    | 20                                | 68  | 1/68 (1.45)       |
| Rinaldi et al. (2021) [67] | Caspofungin,<br>Anidulafungin | 13 (7-20)                         | 95  | 9/95 (9.5)        |

Data presented as mean ± standard deviation, median (range) or number of patients (%).
